# Supplementary material for: Mutation in xyloglucan 6-xylosytransferase results in abnormal root hair development in Oryza sativa
Source: PubMed Central journal article supplement (PMC4112626; doi:10.1093/jxb/eru189), 2014-05-15
Supplement: supp_eru189_jexbot118448_file001.pdf [file supp_eru189_jexbot118448_file001.pdf]

Mutation in xyloglucan 6-xylosyltransferase results in abnormal root hair development in *Oryza sativa*. Chuang Wang, Shuai Li, Sophia Ng, Baocai Zhang, Yihua Zhou, James Whelan, Ping Wu, and Huixia Shou

## SUPPLEMENTARY DATA

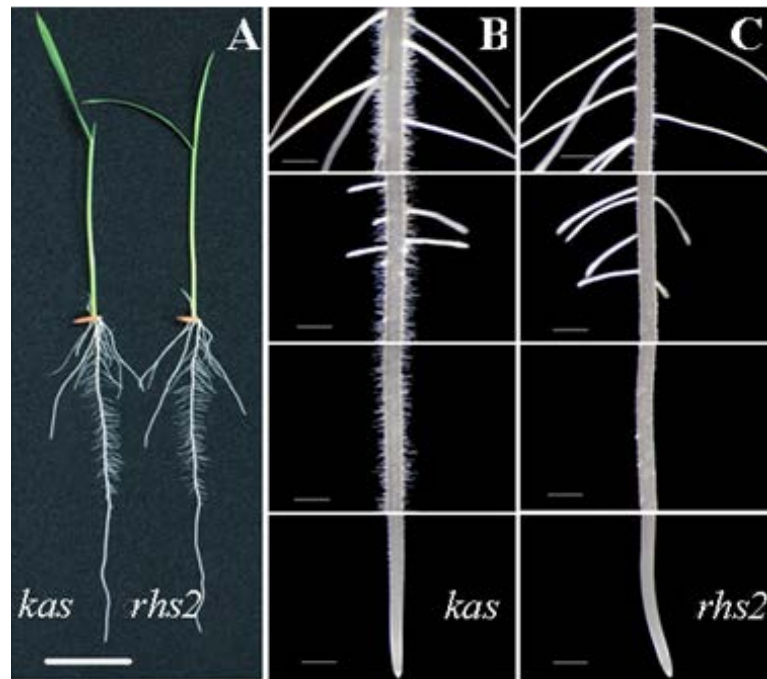

**Supplementary Figure S1.** Growth performance of *srh2* mutant and wild type (cv Kasalath, *kas*) plants. The seedlings were grown in nutrient solution (pH 5.5) for seven days and examined under an electron microscope examination.

## Figure S2

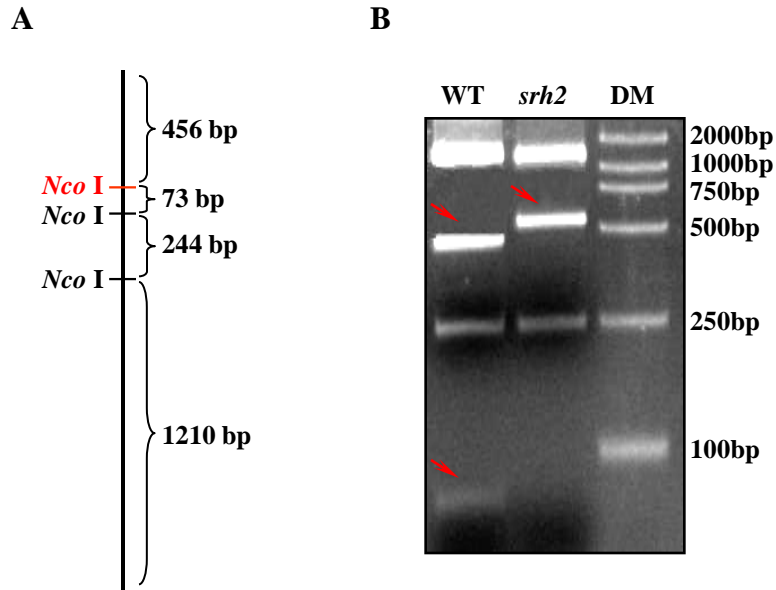

**Supplementary Figure S2.** Confirmation the single nucleotide mutation of *srh2* by dCAPS marker. A, The PCR fragment of WT contained three *Nco* I site while mutation of *srh2* eliminate one *Nco* I site (red colour). B, Electrophoresis of *Nco* I digeted PCR product. The red arrows indicated specific digested fragment of wild type and mutant samples.

# Figure S3

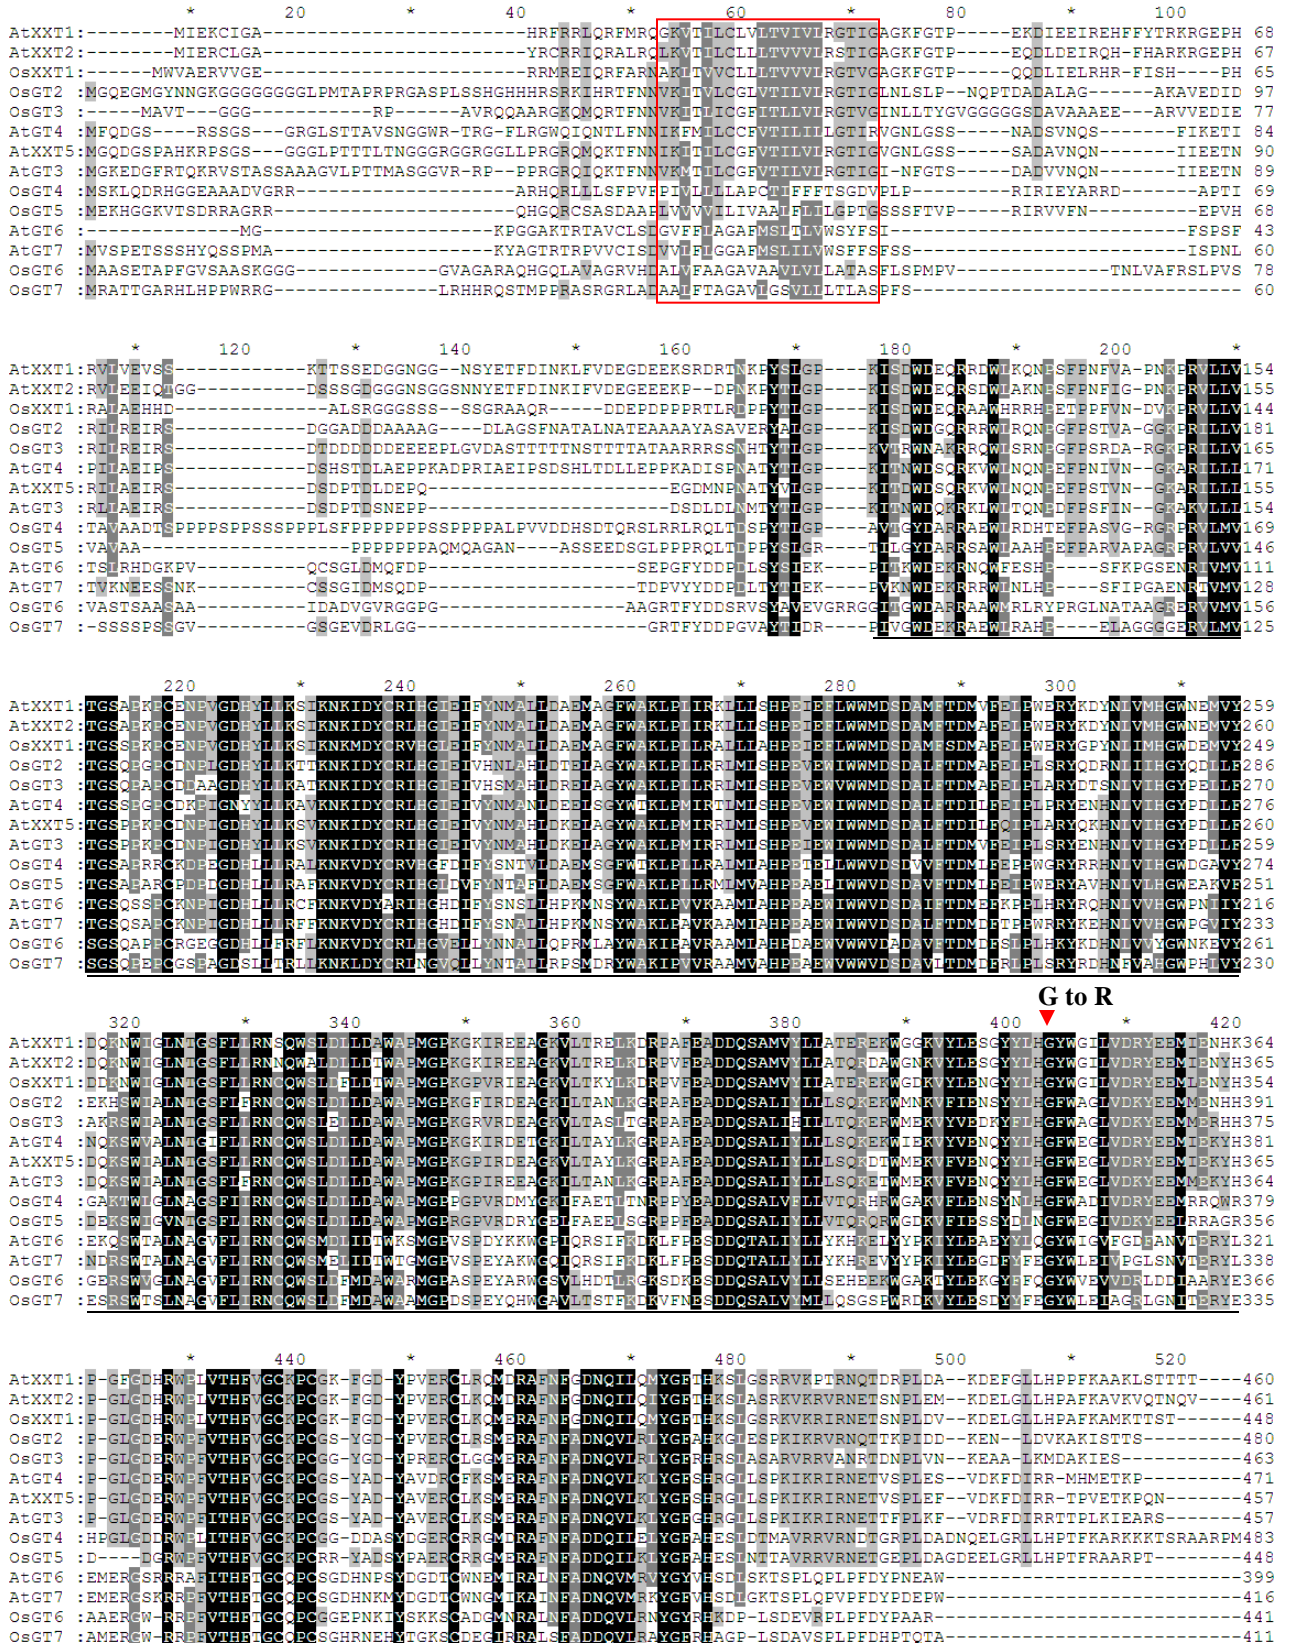

**Supplementary Figure S3.** Protein sequence alignment of putative xyloglucan 6-xylosyltransferase in Arabidopsis and rice. The transmembrane and glycosyltransferase domains were indicated by red box and black line, respectively.

## Figure S4

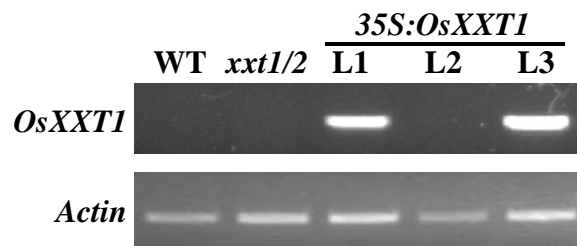

**Supplementary Figure S4.** The expression of *OsXXT1* in complementation Arabidopsis by RT-PCR.

**Figure S5**

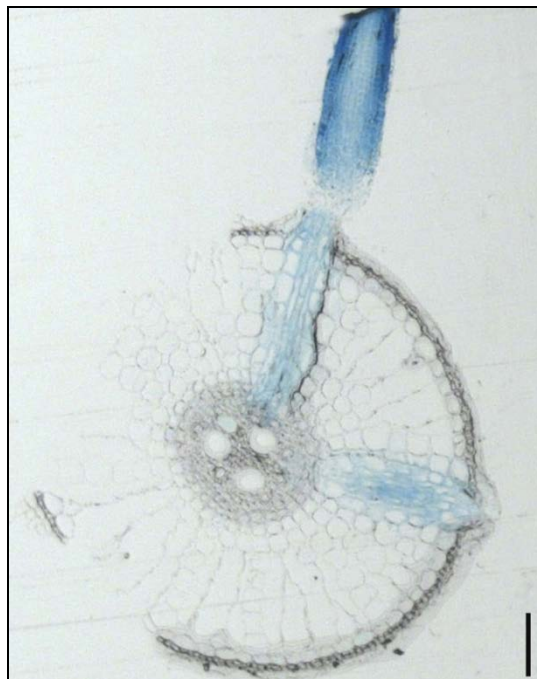

**Supplementary Figure S5. A,** Transverse section of root mature region of OsXXT1::promoter GUS plants. Bar = 20  $\mu$ m.

### **Supplementary Table S1 Primers used in this research**

| Primer name     | Forward (5' to 3')               | Reverse (5' to 3')            |
|-----------------|----------------------------------|-------------------------------|
| OsXXT1-Ox       | ACCCAAACTCCCTTGTC AACC           | CGCGTTGGCTGGCTATTC            |
| OsXXT1-Promoter | ATCGAAGCTTCCATGAAGAAGACCAGTGCTGA | CGATGGATCCCCTCTCCTGCCCCTTCCTC |
| STS274-03-04    | CATCCACATTGTCTGCGGTC             | CTCGCTGAAACTCTTGACTG          |
| STS274-04       | TGTGGTTAGCCAGCTCCTGG             | AACACTCCAGCCAGCGAGCG          |
| STS274-04-06    | GATGCAATCTCACCTCAATAC            | GGTGATGCAAAGACCTGGTAA         |
| STS274-08       | CGCTGTATACTGCATAGCAGTAG          | TGAGGTAAGTCATTAGCTCATG        |
